# Supplementary material for: Establishing zebrafish as a model to study the anxiolytic effects of scopolamine
Source: PubMed Central journal article supplement (PMC5678162; doi:10.1038/s41598-017-15374-w), 2017-11-08
Supplement: 41598_2017_15374_MOESM1_ESM.pdf [file 41598_2017_15374_MOESM1_ESM.pdf]

**Supplementary Information**  
**Raw Data**

**Title:** Establishing zebrafish as a model to study the anxiolytic effects of scopolamine

**Authors:** Trevor J. Hamilton<sup>1,2</sup>, Adam Morrill<sup>1</sup>, Kayla Lucas<sup>1</sup>, Joshua Gallup<sup>1</sup>, Megan Harris<sup>1</sup>,  
Meghan Healey<sup>1</sup>, Taylor Pitman<sup>1</sup>, Melike Schalomon<sup>1</sup>, Shannon Digweed<sup>1</sup>, Martin Tresguerres<sup>3</sup>

**Affiliations:**

<sup>1</sup>Department of Psychology, MacEwan University, Edmonton, AB, Canada, T5J 4S2.

<sup>2</sup>Neuroscience and Mental Health Institute, University of Alberta, Edmonton, AB, Canada, T6G  
2H7.

<sup>3</sup>Scripps Institution of Oceanography, University of California San Diego, 9500 Gilman Drive, La  
Jolla, CA 92093

- Corresponding author: [trevorjameshamilton@gmail.com](mailto:trevorjameshamilton@gmail.com)

## Ethanol Novel Approach Test

Time in inner zone (s)

|          | Ethanol (%) | Ethanol (%) | Ethanol (%) |
|----------|-------------|-------------|-------------|
| control  | 0.5         | 1           | 1.5         |
| 17.58425 | 2.23557     | 15.18185    | 5.305306    |
| 3.670335 | 33.19987    | 73.34       | 129.296     |
| 3.43677  | 8.875538    | 3.703705    | 58.92559    |
| 2.73607  | 24.19086    | 4.004004    | 17.28395    |
| 15.41541 | 4.104104    | 38.53854    | 28.86219    |
| 21.32132 | 2.335668    | 2.102102    | 48.71539    |
| 12.31231 | 9.009006    | 6.940272    | 14.38105    |
| 3.63697  | 0.734068    | 26.82682    | 0.834168    |
| 6.706706 | 2.569235    | 1.668335    | 50.28361    |
| 1.601601 | 22.98965    | 5.238574    | 103.637     |
| 11.44478 | 16.64998    | 10.91091    | 114.648     |
| 20.02002 | 2.102102    | 32.63264    | 1.568233    |
| 11.04438 | 3.036369    | 33.73373    | 36.3697     |
| 2.102102 | 3.370039    | 6.840173    | 77.44411    |
| 11.87854 | 2.936269    | 28.06139    | 19.15248    |
| 2.102103 | 9.609611    |             | 88.42175    |
| 1.334667 |             |             | 10.34368    |
| 4.070736 |             |             | 32.03203    |

Distance traveled (cm)

| Control  | 0.5% Eth | 1% Eth   | 1.5% Eth |
|----------|----------|----------|----------|
| 1803.768 | 1690.91  | 5916.987 | 4676.352 |
| 4007.594 | 3544.085 | 3799.057 | 669.5609 |
| 3918.751 | 4659.136 | 959.7931 | 2422.881 |
| 3609.898 | 3245.185 | 5018.603 | 895.087  |
| 4349.391 | 2833.957 | 3194.693 | 4446.634 |
| 4462.484 | 3173.349 | 3596.961 | 3164.14  |
| 3437.224 | 3524.844 | 5772.05  | 214.1318 |
| 1895.332 | 3673.7   | 3849.808 | 880.8222 |
| 4936.032 | 2799.613 | 4784.581 | 4109.272 |

|          |          |          |          |
|----------|----------|----------|----------|
| 3958.141 | 2525.234 | 3617.839 | 2127.263 |
| 3934.875 | 2438.702 | 289.0891 | 2344.013 |
| 5803.09  | 3503.31  | 267.3674 | 3949.77  |
| 3305.879 | 4180.771 | 266.2663 | 2345.465 |
| 2903.709 | 2985.26  | 293.1598 | 3353.148 |
| 3376.344 | 3511.205 | 271.9386 | 1015.259 |
| 2842.222 | 3411.563 |          | 3118.37  |
| 3047.95  |          |          | 3436.525 |
| 4519.449 |          |          | 4470.25  |

Immobility (s)

| Control  | 0.5% Eth | 1% Eth   | 1.5% Eth   |
|----------|----------|----------|------------|
| 31.13113 | 49.24925 | 0        | 0.033366   |
| 0.233566 | 0.066734 | 1.101096 | 221.8552   |
| 0.100099 | 0.734068 | 226.3263 | 1.634962   |
| 0.100101 | 0.033367 | 0.066732 | 237.1705   |
| 0        | 5.305303 | 1.835165 | 10.14348   |
| 0        | 0.467133 | 104.2376 | 87.25392   |
| 78.61195 | 0.2002   | 0        | 271.2379   |
| 98.93228 | 0        | 0        | 206.1061   |
| 0        | 0.33367  | 0.467132 | 0.200197   |
| 75.74241 | 0.367034 | 1.468134 | 11.444779  |
| 0.734067 | 1.468137 | 0.133467 | 82.916253  |
| 0.4004   | 0.066734 | 0.033367 | 10.243571  |
| 0.433767 | 0.033367 | 0.100101 | 54.587905  |
| 0.467134 | 0.033366 | 4.170834 | 0.533867   |
| 0        | 2.736066 | 0.633966 | 147.180512 |
| 0.333667 | 0.133468 |          | 1.701703   |
| 1.868537 |          |          | 31.097768  |
| 0.033367 |          |          | 0.967637   |

**Scopolamine  
- Novel  
Approach  
Test**

Distance traveled (cm)

| 0        | 200      | 400      | 800      | 1200     | 1600     |
|----------|----------|----------|----------|----------|----------|
| 1803.768 | 4749.449 | 4425.048 | 2753.066 | 2961.461 | 3987.179 |
| 4007.594 | 3742.047 | 3413.206 | 5281.54  | 2340.645 | 3643.979 |
| 3918.751 | 3819.967 | 3191.863 | 3041.162 | 3273.709 | 3833.039 |
| 3609.898 | 3991.967 | 4187.806 | 3306.344 | 2896.832 | 2564.446 |
| 4349.391 | 3939.288 | 4290.92  | 4001.124 | 2406.522 | 3698.656 |
| 4462.484 | 2544.349 | 4794.614 | 3074.561 | 2119.555 | 6814.589 |
| 3437.224 | 4050.212 | 5831.062 | 2971.817 | 2059.05  | 4493.856 |
| 1895.332 | 3834.659 | 4095.795 | 2886.302 | 2062.471 | 4885.78  |
| 4936.032 | 3697.585 | 4406.611 | 1425.287 | 2698.972 | 4312.271 |
| 3958.141 | 3260.004 | 2024.506 | 3294.144 | 3147.392 | 2543.098 |
| 3934.875 | 4344.942 | 2834.971 | 4795.517 | 2609.544 | 3625.146 |
| 5803.09  | 4387.348 | 1884.504 | 5130.94  | 2194.28  | 3883.131 |
| 3305.879 | 3416.866 | 5403.369 | 2700.195 | 3465.891 | 4044.28  |
| 2903.709 | 5467.641 | 2885.529 | 4070.382 | 2992.198 | 2072.848 |
| 3376.344 | 2775.591 | 3688.948 | 3408.499 | 3572.342 | 2517.943 |
| 2842.222 | 5093.926 | 2454.214 | 7222.749 | 4873.429 | 4811.372 |
| 3047.95  | 4266.673 |          | 2145.414 |          | 2780.385 |
| 4519.449 | 6686.917 |          | 5275.024 |          | 4272.039 |
|          |          |          | 7817.786 |          |          |

Time in inner zone (s)

| 0        | 200      | 400      | 800      | 1200     | 1600     |
|----------|----------|----------|----------|----------|----------|
| 17.58425 | 7.27394  | 28.92893 | 9.209209 | 27.7611  | 20.65399 |
| 3.670335 | 0.633967 | 15.31532 | 11.77845 | 10.74408 | 3.003003 |
| 3.43677  | 11.67834 | 20.48716 | 27.29396 | 14.61462 | 13.41341 |

|          |          |          |          |          |          |
|----------|----------|----------|----------|----------|----------|
| 2.73607  | 7.874542 | 3.336669 | 23.69036 | 38.57191 | 31.36469 |
| 15.41541 | 19.65299 | 8.942276 | 13.27995 | 10.34367 | 14.18085 |
| 21.32132 | 12.37905 | 6.473141 | 68.7354  | 14.14748 | 11.21121 |
| 12.31231 | 54.88822 | 1.534868 | 17.51752 | 1.501502 | 28.02803 |
| 3.63697  | 1.301302 | 20.05338 | 37.50417 | 6.139473 | 9.943275 |
| 6.706706 | 7.073739 | 8.742076 | 27.49416 | 2.435769 | 9.676341 |
| 1.601601 | 2.702703 | 46.54655 | 17.88455 | 15.61562 | 5.905909 |
| 11.44478 | 9.309306 | 19.98665 | 10.51051 | 83.81715 | 8.57524  |
| 20.02002 | 26.99366 | 34.3677  | 23.89055 | 15.18185 | 14.38105 |
| 11.04438 | 13.88054 | 11.87854 | 13.61361 | 11.94528 | 14.71471 |
| 2.102102 | 18.28495 | 19.45278 | 10.51052 | 24.82483 | 30.4638  |
| 11.87854 | 3.470136 | 6.639973 | 12.67935 | 7.140474 | 25.45879 |
| 2.102103 | 1.768435 | 5.472139 | 25.39206 | 4.23757  | 0        |
| 1.334667 | 2.802805 |          | 15.04838 |          | 11.47815 |
| 4.070736 | 39.53955 |          | 5.13847  |          | 2.369035 |
|          |          |          | 16.51652 |          |          |

Immobility (s)

| 0        | 200      | 400      | 800      | 1200     | 1600     |
|----------|----------|----------|----------|----------|----------|
| 31.13113 | 0        | 0.600601 | 3.370041 | 0.6006   | 0        |
| 0.233566 | 0.133466 | 0.200199 | 0        | 0.367031 | 0        |
| 0.100099 | 0.166833 | 0.1001   | 0.433766 | 0.033366 | 2.2022   |
| 0.100101 | 0.600602 | 0        | 3.570233 | 0.166831 | 61.62828 |
| 0        | 0.166833 | 0.4004   | 0.233568 | 0.400401 | 0.200201 |
| 0        | 27.32733 | 0        | 22.95628 | 16.38305 | 0.100098 |
| 78.61195 | 16.51652 | 0        | 0.266931 | 7.507514 | 0.133467 |
| 98.93227 | 0        | 0.166835 | 0.433768 | 1.968638 | 0.200201 |
| 0        | 0.433766 | 0.3003   | 0.066734 | 0.033366 | 107.2406 |
| 75.74242 | 36.13614 | 3.536876 | 30.79747 | 34.20087 | 0.1001   |
| 0.734067 | 0.033367 | 2.1021   | 0        | 0.734068 | 0.133467 |
| 0.4004   | 0.033367 | 1.101105 | 17.68435 | 0.233568 | 0.300301 |
| 0.433767 | 0.6006   | 0.200198 | 60.89423 | 0.166835 | 6.539869 |
| 0.467134 | 0        | 0.800803 | 0.066734 | 0.200199 | 0.800801 |
| 0        | 0.400398 | 0.066734 | 0.033367 | 0.233568 | 0        |
| 0.333667 | 0        | 12.87954 | 0        | 1.134468 | 1.73507  |
| 1.868537 | 38.77211 |          | 4.104098 |          | 0.166834 |
| 0.033367 | 0.033366 |          | 0        |          | 0        |
|          |          |          | 0        |          |          |

## Scopolamine Novel Tank Diving Test

Time in zone (s)

Top Zone  
CTL                      s

|          |          |
|----------|----------|
| 33.9673  | 345.7457 |
| 71.57158 | 241.5082 |
| 10.07674 | 177.3774 |
| 34.73473 | 104.004  |
| 75.1418  | 46.47982 |
| 107.2739 | 113.7137 |
| 41.44144 | 97.53087 |
| 142.4091 | 167.1672 |
| 1.001001 | 109.3427 |
| 40.20687 | 125.1251 |
|          | 29.82983 |
|          | 278.2783 |
|          | 47.81449 |

Middle Zone  
CTL                      s

|          |          |
|----------|----------|
| 258.8922 | 190.7574 |
| 107.374  | 225.4254 |
| 72.03871 | 177.4441 |
| 203.6036 | 266.2663 |
| 149.5829 | 83.24991 |
| 94.4945  | 246.046  |
| 185.6857 | 158.8589 |
| 193.1598 | 189.623  |
| 74.74141 | 286.8869 |
| 184.5512 | 168.1682 |

95.06172  
214.8148  
178.0447

Bottom Zone

| CTL      | s        |
|----------|----------|
| 307.1405 | 68.56857 |
| 421.0544 | 133.0998 |
| 517.8845 | 245.2119 |
| 361.6617 | 229.7631 |
| 375.2753 | 470.3036 |
| 398.2316 | 240.2736 |
| 372.8729 | 342.3757 |
| 264.4311 | 243.2432 |
| 524.2576 | 203.8038 |
| 375.2419 | 306.7401 |
|          | 475.1418 |
|          | 106.9403 |
|          | 374.1742 |

## Scopolamine Shoaling

Interindividual distance (cm)

| Control  | Scopolamine |
|----------|-------------|
| 13.64534 | 21.58942    |
| 13.69688 | 21.36891    |
| 13.66039 | 20.75371    |
| 13.93193 | 20.54519    |
| 14.1509  | 21.39968    |
| 14.27142 | 20.85162    |

Nearest neighbour distance  
(cm)

| Control  | Scopolamine |
|----------|-------------|
| 10.91572 | 14.50113    |
| 8.516113 | 29.78       |
| 13.9546  | 16.9646     |
| 13.58025 | 18.48138    |
| 7.981942 | 18.96373    |
| 22.83022 | 19.00323    |
